# Supplementary material
Source: PubMed Central journal article supplement (PMC6675877)
Supplement: JVI.00731-19-s0001.pdf [file JVI.00731-19-s0001.pdf]

1 **Supplementary Table 1**

| ACCESSION    | NAME        | FUNCTION | SEQUENCE                     |
|--------------|-------------|----------|------------------------------|
| NM_001032828 | KLRD11-10R  | LE       | tgaatcatctattggtgagacacg     |
| NM_001032828 | KLRD12-10R  | LE       | aaaattgtgcatttaaatgatgttct   |
| NM_001032828 | KLRD13-10R  | BL       | gaaatttagccaaaaagagaatga     |
| NM_001032828 | KLRD14-10R  | LE       | attaaagaatctgaaagttgagatgaa  |
| NM_001032828 | KLRD15-10R  | LE       | attgttgagctgagctggag         |
| NM_001032828 | KLRD16-10R  | LE       | cttttcagatagaacagcgttga      |
| NM_001032828 | KLRD17-10R  | LE       | agtagagaaggcacgatgtgca       |
| NM_001032828 | KLRD18-10R  | LE       | tgagaaattatgtccaagagcga      |
| NM_001032828 | KLRD19-10R  | LE       | cagagtggcttaaacactgccca      |
| NM_001032828 | KLRD110-10R | LE       | aggtcccagaaattaacctcca       |
| NM_001032828 | KLRD111-10R | LE       | caacgaaaggcatattatcccta      |
| NM_001032828 | KLRD112-10R | LE       | cagaattccaacgtagccat         |
| NM_001032828 | KLRD113-10R | LE       | cactcagtttagtaaagaattttcaa   |
| NM_001032828 | KLRD114-10R | LE       | cctggagtatatgctggctcaa       |
| NM_001032828 | KLRD115-10R | LE       | tctttctggagttctatgttgggt     |
| NM_001032828 | KLRD116-10R | LE       | gtggcaagaacagcagtcagag       |
| NM_001032828 | KLRD117-10R | LE       | cggtaccaaccatttttc           |
| NM_001032828 | KLRD118-10R | LE       | actggaaatgaagtaacagttgcat    |
| NM_001032828 | KLRD119-10R | LE       | ttcgttccacgttttctctc         |
| NM_001032828 | KLRD120-10R | LE       | agaggcgcagaaatgcctac         |
| NM_001032828 | KLRD121-10R | LE       | gctgaagcagactggattctg        |
| NM_001032828 | KLRD122-10R | LE       | aatccagctcatctctgtttgaa      |
| NM_001032828 | KLRD123-10R | LE       | taaaaatgttgactggagctcataa    |
| NM_001032828 | KLRD124-10R | LE       | cctcactataagagagtcfaatccag   |
| NM_001032828 | KLRD125-10R | LE       | cacaaccaggcgggtgtgtt         |
| NM_001032828 | KLRD126-10R | LE       | gagtgcggagccattctcc          |
| NM_001032828 | KLRD127-10R | LE       | cgatggaaatagatcctggga        |
| NM_001032828 | KLRD128-10R | LE       | cagttcttggttaaaagttcaaaa     |
| NM_001032828 | KLRD129-10R | LE       | catttcccttgaattatgctatg      |
| NM_001032828 | KLRD130-10R | LE       | ttagttcacaggattcgtctaag      |
| NM_001032828 | KLRD131-10R | LE       | agctgttgcttacagatataacgatt   |
| NM_001032828 | KLRD132-10R | LE       | gccccagaacggttaaatg          |
| NM_001032828 | KLRD133-10R | LE       | gggtcttactctccacctctct       |
| NM_001032828 | KLRD134-10R | BL       | caggtactgtgcattattagtaatgtt  |
| NM_001032828 | KLRD135-10R | BL       | tccagaagtagacaattagtaacaataa |
| NM_001032828 | KLRD136-10R | LE       | agacactgtttgaaaacattttatagac |
| NM_001032828 | KLRD137-10R | LE       | ttgttcacatctatgacaattgtgta   |

2  
3 **Supplementary Table 1 Rhesus macaque-specific probeset sequences designed**  
4 **for RNA-Flow for KLRD1 (NM\_001032828).** LE, label extender probes; BL, blocking  
5 probes.
